# Supplementary material for: Operationalising Community Engagement in One Health Through Community Conversations in the Horn of Africa
Source: Research Square preprint supplement (doi:10.21203/rs.3.rs-7729981/v1), 2025-10-30
Supplement: Supplementary file 1 [file 7f6f170d5d84ad3ea7fbe7b6.docx]

*Supplementary File 1, Table 1. Pre–post assessment items used in the Community Conversations (CCs). This table presents a subset of items adapted from a previously validated Knowledge, Attitudes, and Practices (KAP) scale (Ref). Items were selected to align with topics covered during the CCs sessions and to create a rapid KAP assessment tool. Item codes correspond to those in the original scale.*

| **Item code** | **Item Full Statement** | **Item Short Statement** | | **Response** | |
| --- | --- | --- | --- | --- | --- |
| **KNOWLEDGE ITEMS** | | |  | |  | |
| **K_1** | Close contact with livestock can lead to transmission of diseases from animals to humans | Disease can spread via livestock contact | | True, False, Don't Know | |
| **K_2** | Mosquitoes and other insects can transmit diseases from animals to humans. | Mosquitoes can spread animal diseases | | True, False, Don't Know | |
| **K_4** | Animals can transmit diseases to humans by biting | Animal bites can spread diseases | | True, False, Don't Know | |
| **K_7** | The disease Rift Valley fever can be transmitted from animals to humans by mosquitoes | RVF spreads through mosquitoes | | True, False, Don't Know | |
| **K_8** | The disease Rift Valley fever can be transmitted from animals to humans by handling birth products like aborted fetuses and placenta | RVF spreads through birth products | | True, False, Don't Know | |
| **K_9** | The disease brucellosis can be transmitted from animals to humans through drinking unboiled milk. | Drinking Raw milk spreads brucellosis | | True, False, Don't Know | |
| **K_12** | The disease anthrax can be transmitted to humans through touching the skin or hide of animals that are sick with anthrax. | Anthrax spreads by touching hides | | True, False, Don't Know | |
| **K_21** | In animals, not taking antimicrobials for the prescribed number of days can lead germs to develop resistance. | Stopping drugs early causes resistance | | True, False, Don't Know | |
| **K_26** | Antimicrobial drugs can be found in the milk of recently treated animals. | Drug residues remain in milk post-treatment | | True, False, Don't Know | |
| **K_30** | Drinking water from communal water sources is unsafe if not boiled properly. | Unboiled communal water is unsafe | | True, False, Don't Know | |
| **K_31** | Boiling milk reduces the risk of disease transmission from animals to humans. | Boiling milk lowers disease risk | | True, False, Don't Know | |
| **K_36** | Undercooked meat may carry germs that can make people sick. | Undercooked meat carries germs | | True, False, Don't Know | |
| **K_39** | There is a human health risk if sick animals are slaughtered for human consumption. | Slaughtering sick animals is risky | | True, False, Don't Know | |
| **ATTITUDE ITEMS** | | | | |  | |
| **A_3** | How risky is it for children's health to play with animal manure? | Perceived risk of children playing with manure | | V. Risky,  Somewhat Risky,  Not Risky,  Don't Know | |
| **A_5** | How important is it to wear protective clothing when slaughtering animals? | Wear protective clothing when slaughtering | | V. Important, Somewhat Important, Not Important, Don't Know | |
| **A_8** | How concerned are you about getting a disease if an animal bites you? | Concern about disease from animal bites | | V. Concerned,  Somewhat Concerned,  Not Concerned,  Don't Know | |
| **A_9** | When mosquitoes are abundant during flooding, I am afraid of catching Rift Valley fever. | Concern about RVF when mosquitoes increase | | Strongly Agree, Somewhat Agree,  Don't Agree, Don't Know | |
| **A_10** | When many animals are dying in my area, I am afraid of contracting a disease if I eat the meat of such animals. | Perceived disease risk from sick animals’ meat | | Strongly Agree, Somewhat Agree,  Don't Agree, Don't Know | |
| **A_28** | When animals show improvement, there is no need to complete the entire prescribed course of antimicrobial medication. | Stopping antimicrobials when animals improve | | Strongly Agree, Somewhat Agree,  Don't Agree, Don't Know | |
| **A_34** | How important is it for your health to wash hands before handling food? | Importance of handwashing before eating food | | V. Important, Somewhat Important, Not Important, Don't Know | |
| **PRACTICE ITEMS** | | | | |  | |
| **P_3** | Do you slaughter sick animals for human consumption before they die? | Slaughter sick animals | | Yes, always,  Yes, sometimes,  No, never,  Don't know/Don't want to answer | |
| **P_5** | Do you dispose dead animals by burying, burning, or a combination of both? | Dispose dead animals safely | | Yes, always,  Yes, sometimes,  No, never,  Don't know/Don't want to answer | |
| **P_7** | Do you ever touch animal manure with your bare hands?4 | Touch manure barehanded | | Yes, always,  Yes, sometimes,  No, never,  Don't know/Don't want to answer | |
| **P_8** | Do you ever touch birth products with your bare hands? | Touch birth products barehanded | | Yes, always,  Yes, sometimes,  No, never,  Don't know/Don't want to answer | |
| **P_9** | Do you report animal disease outbreaks to community animal health workers or veterinary authorities? | Report animal outbreaks | | Yes, always,  Yes, sometimes,  No, never,  Don't know/Don't want to answer | |
| **P_11** | If you were bitten by a dog, would you seek healthcare? | Seek care after dog bite | | Yes, always,  Yes, sometimes,  No, never,  Don't know/Don't want to answer | |
| **P_12** | Do you isolate your animals when they are sick? | Isolate sick animals | | Yes, always,  Yes, sometimes,  No, never,  Don't know/Don't want to answer | |
| **P_16** | Do you use antimicrobials to protect your livestock from diseases even if they are healthy? | Use antimicrobials preventively | | Yes, always,  Yes, sometimes,  No, never,  Don't know/Don't want to answer | |
| **P_18** | Do you seek advice from an animal health professional before giving antimicrobials to your livestock? | Seek vet advice before AM use | | Yes, always,  Yes, sometimes,  No, never,  Don't know/Don't want to answer | |
| **P_21** | Do you follow the recommended course of antimicrobial treatment in animals? | Follow AM course | | Yes, always,  Yes, sometimes,  No, never,  Don't know/Don't want to answer | |
| **P_23** | Do you abstain from drinking milk of recently treated animals? | Avoid milk from treated animals | | Yes, always,  Yes, sometimes,  No, never,  Don't know/Don't want to answer | |
| **P_24** | Do you abstain from eating meat of recently treated animals? | Avoid meat from treated animals | | Yes, always,  Yes, sometimes,  No, never,  Don't know/Don't want to answer | |
| **P_29** | Do you use soap or ash to wash your hands before handling food? | Wash hands before food prep | | Yes, always,  Yes, sometimes,  No, never,  Don't know/Don't want to answer | |
| **P_30** | Do you consume undercooked meat? | Eat undercooked meat | | Yes, always,  Yes, sometimes,  No, never,  Don't know/Don't want to answer | |
| **P_32** | Do you drink unboiled milk? | Drink unboiled milk | | Yes, always,  Yes, sometimes,  No, never,  Don't know/Don't want to answer | |
| **P_35** | Do you wash your hands with water and soap/ash before eating? | Wash hands before eating | | Yes, always,  Yes, sometimes,  No, never,  Don't know/Don't want to answer | |

*Supplementary File 1, Table 2. Baseline knowledge theta scores by demographic subgroup among CCs participants (n = 369), showing median scores, interquartile ranges (IQR), and p-values from Kruskal–Wallis or Wilcoxon rank-sum tests for group differences.*

| **Characteristic** | **Category** | **N** | **Baseline Median Theta** | **IQR** | **p-value** |
| --- | --- | --- | --- | --- | --- |
| **Country** | Ethiopia | 152 | -0.48 | 2.32 | **<0.001** |
| Kenya | 82 | 0.53 | 1.68 |
| Somalia | 135 | 0.18 | 1.52 |
| **Gender** | Female | 171 | 0.22 | 2.13 | 0.322 |
| Male | 198 | -0.16 | 1.72 |
| **Age Group** | <30 | 66 | 0.53 | 1.56 | **0.035** |
| 31-45 | 172 | -0.16 | 2.18 |
| >46 | 131 | -0.07 | 1.73 |
| **Household Role** | Head | 217 | -0.01 | 1.91 | **0.022** |
| Grandparent | 48 | -0.44 | 1.83 |
| Others | 104 | 0.5 | 1.59 |
| **Literacy Status** | Illiterate | 222 | 0.21 | 1.95 | 0.781 |
| Literate | 147 | -0.02 | 1.67 |
| **Production System** | Pastoral | 197 | 0 | 1.69 | 0.319 |
| Agro-pastoral | 135 | -0.15 | 2.09 |
| Others | 37 | 0.51 | 2.05 |
| **Livestock-Derived Income** | <50% | 119 | 0.24 | 1.59 | **0.003** |
| ~50% | 99 | 0.5 | 1.9 |
| >50% | 151 | -0.17 | 2.2 |

Supplementary File 1, Table 3. Baseline attitude theta scores by demographic subgroup among CCs participants (n = 369), showing median scores, interquartile ranges (IQR), and p-values from Kruskal–Wallis or Wilcoxon rank-sum tests for group differences.

| **Characteristic** | **Category** | **N** | **Baseline Median Theta** | **IQR** | **p-value** |
| --- | --- | --- | --- | --- | --- |
| **Country** | Ethiopia | 152 | -0.26 | 1.93 | 0.179 |
| Kenya | 82 | 0.13 | 1.52 |
| Somalia | 135 | -0.06 | 1.44 |
| **Gender** | Female | 171 | -0.07 | 1.81 | 0.863 |
| Male | 198 | -0.07 | 1.56 |
| **Age Group** | <30 | 172 | -0.16 | 1.75 | **0.010** |
| 31-45 | 66 | 0.17 | 1.27 |
| >46 | 131 | -0.12 | 1.61 |
| **Household Role** | Head | 217 | -0.06 | 1.71 | **0.005** |
| Grandparent | 48 | -0.62 | 1.46 |
| Others | 104 | 0.13 | 1.61 |
| **Literacy Status** | Illiterate | 222 | -0.08 | 1.8 | 0.988 |
| Literate | 147 | -0.06 | 1.53 |
| **Production System** | Pastoral | 197 | -0.11 | 1.42 | 0.044 |
| Agro-pastoral | 135 | -0.07 | 1.98 |
| Others | 37 | 0.28 | 1.31 |
| **Livestock-Derived Income** | <50% | 119 | -0.06 | 1.1 | **<0.001** |
| ~50% | 99 | 0.24 | 1.91 |
| >50% | 151 | -0.45 | 1.97 |

*Supplementary File 1, Table 4. Baseline practice composite scores by demographic subgroup among CCs participants (n = 369), showing median scores, interquartile ranges (IQR), and p-values from Kruskal–Wallis or Wilcoxon rank-sum tests for group differences.*

| **Characteristic** | **Category** | **N** | **Baseline Median Theta** | **IQR** | **p-value** |
| --- | --- | --- | --- | --- | --- |
| **Country** | Ethiopia | 147 | 1.02 | 0.85 | 0.089 |
| Kenya | 77 | 1.1 | 0.6 |
| Somalia | 134 | 1.05 | 0.55 |
| **Gender** | Female | 164 | 1.06 | 0.68 | 0.840 |
| Male | 194 | 1.05 | 0.73 |
| **Age Group** | <30 | 63 | 1.13 | 0.64 | 0.534 |
| 31-45 | 166 | 1.02 | 0.79 |
| >46 | 129 | 1.05 | 0.59 |
| **Household Role** | Head | 211 | 1.05 | 0.76 | **0.034** |
| Grandparent | 47 | 0.85 | 0.42 |
| Others | 100 | 1.11 | 0.6 |
| **Literacy Status** | Illiterate | 215 | 1.07 | 0.68 | 0.423 |
| Literate | 143 | 1 | 0.73 |
| **Production System** | Pastoral | 189 | 0.97 | 0.55 | 0.052 |
| Agro-pastoral | 132 | 1.11 | 0.71 |
| Others | 37 | 1.23 | 0.6 |
| **Income-Derived Income** | <50% | 116 | 1.1 | 0.51 | **<0.001** |
| ~50% | 97 | 1.18 | 0.69 |
| >50% | 145 | 0.86 | 0.71 |
